# Supplementary material
Source: Research Square preprint supplement (doi:10.21203/rs.3.rs-9418456/v1)
Supplement: Supplementary file 1 [file 0e66391b029d6beb220a4ebe.docx]

Supplementary File 1: Structured socio-demographic questionnaire

Title: "Effectiveness of depression literacy and behavioural therapy on stigmatising depression among elderly: A Quasi-Experimental Study”

## Part-A **Socio-Demographic Proforma**

Please tick the most appropriate answer among the alternatives.

1. Age in years-
2. 61-65
3. 65-70
4. 70-75
5. Above 75
6. Gender-
7. Male
8. Female
9. Others
10. Qualification-
11. Illiterate
12. Primary education
13. Higher secondary
14. Graduation
15. Occupation-
16. Employed
17. Unemployed
18. Marital status-
19. Married
20. Unmarried
21. Type of family-
22. Nuclear
23. Joint
24. Monthly income-
25. <10000
26. 10,001-20,000
27. >20,000

Part-B **Depression Stigma Scale (DSS)**

This questionnaire consists of 9 questions related to personal stigma and 9 questions related to perceived stigma by patients. Read each statement and mark the appropriate response. Choose any one option that best represents your view.

| **SL NO** | **ITEMS**  **Personal stigma** | **Strongly**  **Disagree** | **Disagree** | **Neither**  **Agree Nor**  **Disagree** | **Agree** | **Strongly**  **Agree** |
| --- | --- | --- | --- | --- | --- | --- |
| 1 | People with depression could snap out of it if they wanted. |  |  |  |  |  |
| 2 | Depression is a sign of personal weakness. |  |  |  |  |  |
| 3 | Depression is not are all medical illness. |  |  |  |  |  |
| 4 | People with depression are dangerous |  |  |  |  |  |
| 5 | It is best to avoid people with depression, so that you don’t become depresses yourself |  |  |  |  |  |
| 6 | People with depression are unpredictable |  |  |  |  |  |
| 7 | If I had depression, I would not tell anyone |  |  |  |  |  |
| 8 | I would not employ someone if I knew they had been depressed |  |  |  |  |  |
| 9 | I would not vote for a politician if I knew they had been depressed |  |  |  |  |  |
|  | **Perceived stigma** |  |  |  |  |  |
| 10 | Most people believe that people with depression could snap out of it if they wanted. |  |  |  |  |  |
| 11 | Most people believe that depression is a sign of personal weakness |  |  |  |  |  |
| 12 | Most people believe that depression is not are all medical illness |  |  |  |  |  |
| 13 | Most people believe that it is best to avoid people with depression |  |  |  |  |  |
| 14 | Most people believe that it is best to avoid people with depression. |  |  |  |  |  |
| 15 | Most people believe that people with depression are unpredictable. |  |  |  |  |  |
| 16 | If they had depression, most people would not tell anyone. |  |  |  |  |  |
| 17 | Most people would not employ someone they knew had been depressed |  |  |  |  |  |
| 18 | Most people would not vote for a politician they knew had been depressed. |  |  |  |  |  |

**Scoring:** score range of 0 to 72.

0 – No stigma

1–18 Mild stigma

19–36 Moderate stigma

37- 54 Severe stigma

55–72 Extreme stigma

Part -C **Depression Literacy Questionnaire (DLQ)**

This questionnaire consists of 22 questions related to assessing the level of literacy regarding depression among the participants. Read each statement and mark the appropriate response. Choose the option (True/False/Don’t know) that best represents your practice.

TOOL 3- DEPRESSION LITERACY SCALE

1. People with depression often speak in a rambling and disjointed way.

1. True 2. False 3. Don’t know

1. People with depression may feel guilty when they are not at fault.

1. True 2. False 3. Don’t know

1. Reckless and foolhardy behaviour is a common sign of depression.

1. True 2. False 3. Don’t know

1. Loss of confidence and poor self-esteem may be symptoms of depression.

1. True 2. False 3. Don’t know

1. Not stepping on cracks in the footpath may be a sign of depression.

1. True 2. False 3. Don’t know

1. People with depression often hear voices that are not there.

1. True 2. False 3. Don’t know

1. Sleeping too much or too little may be a sign of depression.

1. True 2. False 3. Don’t know

1. Eating too much or losing interest in food may be a sign of depression

1. True 2. False 3. Don’t know

1. Depression does not affect your memory and concentration.

1. True 2. False 3. Don’t know

1. Having several distinct personalities may be a sign of depression.

1. True 2. False 3. Don’t know

1. People may move more slowly or become agitated as a result of their depression.

1. True 2. False 3. Don’t know

1. Clinical psychologists can prescribe antidepressants.

1. True 2. False 3. Don’t know

1. Moderate depression disrupts a person’s life as much as multiple sclerosis or deafness.

1. True 2. False 3. Don’t know

1. Most people with depression need to be hospitalized.

1. True 2. False 3. Don’t know

1. Many famous people have suffered from depression.

1. True 2. False 3. Don’t know

1. Many treatments for depression are more effective and antidepressants.

1. True 2. False 3. Don’t know

1. Counselling is as effective as cognitive behavioural therapy for depression.

1. True 2. False 3. Don’t know

1. Cognitive behavioural therapy is as effective as antidepressants for mild to moderate depression.

1. True 2. False 3. Don’t know

1. Of all the alternative and lifestyle treatments for depression, vitamins are likely to be the most helpful.

1. True 2. False 3. Don’t know

1. People with depression should stop taking antidepressants as soon as they feel better.

1. True 2. False 3. Don’t know

1. Antidepressants are addictive.

1. True 2. False 3. Don’t know

1. Antidepressant medications usually work straight away.

1. True 2. False 3. Don’t know

**Scoring:** Each item is rated on a three-point scale: True, False, Don’t know. A correct answer is awarded 1 point, while incorrect or "don’t know" responses receive 0 points. The maximum obtainable score is 22, with higher scores indicating a higher level of depression literacy.
